# Supplementary material for: Effect of methotrexate use on the development of type 2 diabetes in rheumatoid arthritis patients: A systematic review and meta-analysis
Source: PubMed Central journal article supplement (PMC7337336; doi:10.1371/journal.pone.0235637), 2020-07-06
Supplement: pone.0235637.s007.pdf [file pone.0235637.s007.pdf]

QE Model Risk of T2D  
 RE Model Risk of T2D  
 FE Model Risk of T2D

| spontane | Article No | type of outcome | study yea | study name        | MTX   |       | None MTX  |       |       | Raw score |           |      |
|----------|------------|-----------------|-----------|-------------------|-------|-------|-----------|-------|-------|-----------|-----------|------|
|          |            |                 |           |                   | N1    | Cases | Non-case: | N2    | Cases |           | Non-case: | Qi   |
| 1        | 1          | T2D             | 2017      | Chen et al        | 44635 | 1137  | 43498     | 37547 | 1338  | 36209     | 0.678571  | 9.5  |
| 1        | 2          | T2D             | 2017      | Ozen et al        | 9686  | 765   | 8921      | 3983  | 374   | 3609      | 0.785714  | 11   |
| 1        | 3          | T2D             | 2011      | Solomon et al     | 7614  | 82    | 7532      | 3713  | 55    | 3658      | 0.714286  | 10   |
| 1        | 4          | T2D             | 2007      | Wasko et al       | 3097  | 171   | 2926      | 653   | 54    | 599       | 0.714286  | 10   |
| 1        | 5          | T2D             | 2012      | Antohe et al      | 592   | 49    | 543       | 121   | 16    | 105       | 0.642857  | 9    |
| 1        | 6          | T2D             | 2007      | Assous et al      | 201   | 6     | 195       | 36    | 12    | 24        | 0.5       | 7    |
| 1        | 7          | T2D             | 2009      | Radovits et al    | 112   | 4     | 108       | 110   | 14    | 96        | 0.785714  | 11   |
| 1        | 8          | T2D             | 2017      | Mangoni et al     | 57    | 3     | 54        | 30    | 5     | 25        | 0.857143  | 12   |
| 1        | 9          | T2D             | 2019      | Agca et al        | 195   | 3     | 192       | 131   | 13    | 181       | 0.75      | 10.5 |
| 1        | 10         | T2D             | 2011      | Bili et al        | 482   | 3     | 479       | 312   | 42    | 270       | 0.714286  | 10   |
| 1        | 11         | T2D             | 2018      | Best et al        | 20873 | 7     | 20866     | 23317 | 6446  | 16871     | 0.714286  | 10   |
| 1        | 12         | T2D             | 2001      | del Rincon et al  | 150   | 10    | 140       | 86    | 28    | 58        | 0.785714  | 11   |
| 1        | 13         | T2D             | 2018      | Gomes et al       | 203   | 12    | 191       | 135   | 49    | 86        | 0.535714  | 7.5  |
| 1        | 14         | T2D             | 2011      | Innala et al      | 361   | 8     | 353       | 81    | 33    | 48        | 0.785714  | 11   |
| 1        | 15         | T2D             | 2019      | Ruscitti et al    | 716   | 10    | 706       | 95    | 88    | 7         | 0.785714  | 11   |
| 1        | 16         | T2D             | 2013      | Amaya-Amaya et al | 702   | 4     | 698       | 35    | 28    | 7         | 0.642857  | 9    |
